# Supplementary material for: Influence of Dietary Protein Content on the Nutritional Composition of Mealworm Larvae (Tenebrio molitor L.)
Source: MDPI journal article supplement (doi:10.3390/insects14030261), 2023-03-06
Supplement: s1 [file s1]

## Supplementary Material

**Table S1.** Nutritional composition (as specified by the manufacturer) of substrates on a fresh weight (FW) basis (%) used for *Tenebrio molitor* diets.

| Substrate          | Moisture (%) | Protein (% of FW) | Fat (% of FW) | Carbohydrate (% of FW) | Fiber (% of FW) | Ash (% of FW) | Manufacturer                                                    |
|--------------------|--------------|-------------------|---------------|------------------------|-----------------|---------------|-----------------------------------------------------------------|
| Cassava flour      | 5.9          | 1.0               | 0.0           | 86.0                   | 6.0             | 0.3           | EWL Naturprodukte Handelsagentur AG, Randbach-Baumbach, Germany |
| Pea protein flour  | 2.7          | 80.0              | 8.0           | 4.9                    | 4.2             | 0.2           | Raab Vitalfood GmbH, Rohrbach, Germany                          |
| Potato flakes      | 9.2          | 8.3               | 0.5           | 76.2                   | 4.6             | 1.2           | Mühlenlädle, Kirchberg an der Murr, Germany                     |
| Rice protein flour | 3.9          | 80.0              | 2.9           | 9.6                    | 3.3             | 0.3           | Raab Vitalfood GmbH, Rohrbach, Germany                          |
| Sweet lupine flour | 5.6          | 43.0              | 12.0          | 10.0                   | 28.0            | 1.4           | Natura-Werk Gebr. Hiller GmbH & Co. KG, Hannover, Germany       |
| Wheat bran         | 12.0         | 14.9              | 4.7           | 45.0                   | 17.7            | 5.7           | Roland Mills United GmbH & Co. KG, Bremen, Germany              |

**Table S2.** Amino acid composition of the substrates on a dry matter (DM) basis (%) used for *Tenebrio molitor* diets. Data are presented as mean  $\pm$  standard deviation,  $n = 2$ .

| Amino acid (% DM) | Pea protein flour (PPF) | Rice protein flour (RPF) | Sweet lupine flour (SLF) | Cassava flour (CF) | Potato flakes (PF) | Wheat bran (WB) |
|-------------------|-------------------------|--------------------------|--------------------------|--------------------|--------------------|-----------------|
| Ala               | 4.1 $\pm$ 0.0           | 4.0 $\pm$ 0.0            | 1.2 $\pm$ 0.0            | 0.1 $\pm$ 0.0      | 0.3 $\pm$ 0.0      | 0.6 $\pm$ 0.0   |
| Arg               | 6.4 $\pm$ 0.0           | 8.2 $\pm$ 0.0            | 3.8 $\pm$ 0.0            | 0.1 $\pm$ 0.0      | 0.5 $\pm$ 0.0      | 0.8 $\pm$ 0.0   |
| Asp               | 7.1 $\pm$ 0.0           | 11.3 $\pm$ 0.0           | 3.6 $\pm$ 0.0            | 0.1 $\pm$ 0.0      | 1.2 $\pm$ 0.0      | 1.0 $\pm$ 0.0   |
| Glu               | 14.9 $\pm$ 0.0          | 18.2 $\pm$ 0.0           | 8.3 $\pm$ 0.0            | 0.2 $\pm$ 0.0      | 1.3 $\pm$ 0.0      | 3.5 $\pm$ 0.0   |
| Gly               | 3.4 $\pm$ 0.0           | 3.7 $\pm$ 0.0            | 1.3 $\pm$ 0.0            | 0.1 $\pm$ 0.0      | 0.3 $\pm$ 0.0      | 0.6 $\pm$ 0.0   |
| His               | 1.7 $\pm$ 0.0           | 2.1 $\pm$ 0.0            | 0.4 $\pm$ 0.0            | 0.1 $\pm$ 0.0      | 0.2 $\pm$ 0.0      | 0.3 $\pm$ 0.0   |
| Ile               | 3.2 $\pm$ 0.0           | 4.5 $\pm$ 0.0            | 1.4 $\pm$ 0.0            | 0.1 $\pm$ 0.0      | 0.4 $\pm$ 0.0      | 0.4 $\pm$ 0.0   |
| Leu               | 6.2 $\pm$ 0.0           | 8.0 $\pm$ 0.0            | 2.5 $\pm$ 0.0            | 0.1 $\pm$ 0.0      | 0.7 $\pm$ 0.0      | 1.0 $\pm$ 0.0   |
| Lys               | 2.4 $\pm$ 0.0           | 6.3 $\pm$ 0.0            | 1.0 $\pm$ 0.0            | 0.1 $\pm$ 0.0      | 0.4 $\pm$ 0.0      | 0.3 $\pm$ 0.0   |
| Phe               | 4.1 $\pm$ 0.0           | 5.3 $\pm$ 0.0            | 1.2 $\pm$ 0.0            | n. d.              | 0.4 $\pm$ 0.0      | 0.6 $\pm$ 0.0   |

n. d.: not detected, Ala: alanine; Arg: arginine; Asp: aspartic acid; Glu: glutamic acid; Gly: glycine; His: histidine; Ile: isoleucine; Leu: leucine; Lys: lysine; Phe: phenylalanine; Ser: serine; Thr: threonine; Tyr: tyrosine; Val: valine; Total AAs: total amino acids.; Essential AAs: essential amino acids.

**Table S3.** Orthogonal contrasts (*p*-values) of larval weight gain per larvae (LWGpL), specific growth rate (SGR), food conversion ration (FCR), survival rate and protein efficiency ratio (PER) of *Tenebrio molitor* larvae of different feeding groups.

| Groups       | LWGpL                  |                           | SGR                    |                           | FCR                    |                           | Survival rate          |                           | PER                    |                           |
|--------------|------------------------|---------------------------|------------------------|---------------------------|------------------------|---------------------------|------------------------|---------------------------|------------------------|---------------------------|
|              | <i>p</i> -value linear | <i>p</i> -value quadratic |
| WB vs. PPF80 | <0.001                 | <0.001                    | <0.001                 | <0.001                    | <0.001                 | <0.001                    | >0.05                  | >0.05                     | <0.001                 | <0.001                    |
| WB vs. PPF60 | <0.001                 | <0.001                    | <0.001                 | <0.001                    | >0.05                  | >0.05                     | >0.05                  | >0.05                     | <0.001                 | <0.001                    |
| WB vs. PPF40 | <0.001                 | <0.001                    | <0.001                 | <0.001                    | >0.05                  | >0.05                     | >0.05                  | >0.05                     | <0.001                 | <0.001                    |
| WB vs. PPF20 | <0.001                 | <0.001                    | <0.001                 | <0.001                    | >0.05                  | >0.05                     | >0.05                  | >0.05                     | <0.001                 | <0.001                    |
| WB vs. RPF80 | <0.001                 | <0.001                    | <0.01                  | <0.01                     | >0.05                  | >0.05                     | <0.01                  | <0.01                     | <0.001                 | <0.001                    |
| WB vs. RPF60 | <0.001                 | <0.001                    | <0.01                  | <0.01                     | >0.05                  | >0.05                     | >0.05                  | >0.05                     | <0.001                 | <0.001                    |
| WB vs. RPF40 | <0.001                 | <0.001                    | >0.05                  | >0.05                     | >0.05                  | >0.05                     | >0.05                  | >0.05                     | <0.001                 | <0.001                    |

|                |        |        |        |        |        |        |       |       |             |        |
|----------------|--------|--------|--------|--------|--------|--------|-------|-------|-------------|--------|
| WB vs. RPF20   | <0.001 | <0.001 | >0.05  | >0.05  | <0.05  | <0.05  | >0.05 | >0.05 | <0.001<br>1 | <0.001 |
| WB vs. SLF40   | <0.001 | <0.001 | >0.05  | >0.05  | <0.001 | <0.001 | >0.05 | >0.05 | <0.001<br>1 | <0.001 |
| WB vs. SLF20   | <0.001 | <0.001 | >0.05  | >0.05  | >0.05  | >0.05  | >0.05 | >0.05 | <0.001<br>1 | <0.001 |
| WB vs. CF10    | <0.001 | <0.001 | <0.01  | <0.01  | <0.01  | <0.01  | >0.05 | >0.05 | <0.001<br>1 | <0.001 |
| WB vs. PF10    | <0.001 | <0.001 | >0.05  | >0.05  | >0.05  | >0.05  | >0.05 | >0.05 | <0.001<br>1 | <0.001 |
| PF10 vs. PPF80 | <0.001 | <0.001 | <0.001 | <0.001 | <0.001 | <0.001 | >0.05 | >0.05 | <0.001<br>1 | <0.001 |
| PF10 vs. PPF60 | <0.001 | <0.001 | <0.001 | <0.001 | >0.05  | >0.05  | >0.05 | >0.05 | <0.001<br>1 | <0.001 |
| PF10 vs. PPF40 | <0.001 | <0.001 | <0.001 | <0.001 | >0.05  | >0.05  | >0.05 | >0.05 | <0.001<br>1 | <0.001 |
| PF10 vs. PPF20 | <0.001 | <0.001 | <0.001 | <0.001 | >0.05  | >0.05  | >0.05 | >0.05 | <0.001<br>1 | <0.001 |
| PF10 vs. RPF80 | <0.001 | <0.001 | <0.01  | <0.01  | >0.05  | >0.05  | <0.01 | <0.01 | <0.001<br>1 | <0.001 |
| PF10 vs. RPF60 | <0.001 | <0.001 | <0.01  | <0.01  | >0.05  | >0.05  | >0.05 | >0.05 | <0.001<br>1 | <0.001 |
| PF10 vs. RPF40 | <0.01  | <0.05  | >0.05  | >0.05  | >0.05  | >0.05  | >0.05 | >0.05 | <0.001<br>1 | <0.001 |
| PF10 vs. RPF20 | >0.05  | >0.05  | >0.05  | >0.05  | >0.05  | >0.05  | >0.05 | >0.05 | >0.05       | >0.05  |
| PF10 vs. SLF40 | <0.05  | <0.05  | >0.05  | >0.05  | >0.05  | >0.05  | >0.05 | >0.05 | <0.001<br>1 | <0.001 |
| PF10 vs. SLF20 | >0.05  | >0.05  | >0.05  | >0.05  | >0.05  | >0.05  | >0.05 | >0.05 | >0.05       | >0.05  |
| PF10 vs. CF10  | <0.01  | <0.01  | <0.01  | <0.01  | <0.001 | <0.001 | >0.05 | >0.05 | <0.001<br>1 | <0.001 |
| CF10 vs. PPF80 | <0.001 | <0.001 | <0.001 | <0.001 | >0.05  | >0.05  | >0.05 | >0.05 | <0.001<br>1 | <0.001 |
| CF10 vs. PPF60 | <0.01  | <0.01  | <0.05  | <0.05  | >0.05  | >0.05  | >0.05 | >0.05 | <0.001<br>1 | <0.001 |

|                 |        |        |        |        |        |        |       |       |        |        |
|-----------------|--------|--------|--------|--------|--------|--------|-------|-------|--------|--------|
| CF10 vs. PPF40  | <0.01  | <0.01  | >0.05  | >0.05  | <0.01  | <0.01  | >0.05 | >0.05 | <0.001 | <0.001 |
|                 |        |        |        |        |        |        |       |       | 1      |        |
| CF10 vs. PPF20  | <0.01  | <0.01  | >0.05  | >0.05  | <0.01  | <0.01  | >0.05 | >0.05 | <0.001 | <0.001 |
|                 |        |        |        |        |        |        |       |       | 1      |        |
| CF10 vs. RPF80  | <0.05  | <0.05  | >0.05  | >0.05  | >0.05  | >0.05  | <0.01 | <0.01 | >0.05  | >0.05  |
| CF10 vs. RPF60  | <0.01  | <0.01  | >0.05  | >0.05  | <0.01  | <0.01  | >0.05 | >0.05 | >0.05  | >0.05  |
| CF10 vs. RPF40  | <0.01  | <0.01  | <0.01  | <0.01  | <0.01  | <0.01  | >0.05 | >0.05 | >0.05  | >0.05  |
| CF10 vs. RPF20  | <0.01  | <0.01  | <0.01  | <0.01  | <0.01  | <0.01  | >0.05 | >0.05 | <0.001 | <0.001 |
|                 |        |        |        |        |        |        |       |       | 1      |        |
| CF10 vs. SLF40  | <0.01  | <0.01  | <0.01  | <0.01  | <0.001 | <0.001 | >0.05 | >0.05 | >0.05  | >0.05  |
| CF10 vs. SLF20  | <0.01  | <0.01  | <0.01  | <0.01  | <0.001 | <0.001 | >0.05 | >0.05 | <0.001 | <0.001 |
|                 |        |        |        |        |        |        |       |       | 1      |        |
| SLF20 vs. PPF80 | <0.001 | <0.001 | <0.001 | <0.001 | <0.001 | <0.001 | >0.05 | >0.05 | <0.001 | <0.001 |
|                 |        |        |        |        |        |        |       |       | 1      |        |
| SLF20 vs. PPF60 | <0.001 | <0.001 | <0.001 | <0.001 | >0.05  | >0.05  | >0.05 | >0.05 | <0.001 | <0.001 |
|                 |        |        |        |        |        |        |       |       | 1      |        |
| SLF20 vs. PPF40 | <0.05  | <0.05  | <0.01  | <0.01  | >0.05  | >0.05  | >0.05 | >0.05 | <0.001 | <0.001 |
|                 |        |        |        |        |        |        |       |       | 1      |        |
| SLF20 vs. PPF20 | <0.001 | <0.001 | <0.01  | <0.01  | >0.05  | >0.05  | >0.05 | >0.05 | <0.001 | <0.001 |
|                 |        |        |        |        |        |        |       |       | 1      |        |
| SLF20 vs. RPF80 | <0.01  | <0.01  | <0.001 | <0.001 | >0.05  | >0.05  | <0.01 | <0.01 | <0.001 | <0.001 |
|                 |        |        |        |        |        |        |       |       | 1      |        |
| SLF20 vs. RPF60 | <0.01  | <0.01  | <0.01  | <0.01  | >0.05  | >0.05  | >0.05 | >0.05 | <0.001 | <0.001 |
|                 |        |        |        |        |        |        |       |       | 1      |        |
| SLF20 vs. RPF40 | <0.01  | <0.01  | >0.05  | >0.05  | >0.05  | >0.05  | >0.05 | >0.05 | <0.001 | <0.001 |
|                 |        |        |        |        |        |        |       |       | 1      |        |
| SLF20 vs. RPF20 | >0.05  | >0.05  | >0.05  | >0.05  | >0.05  | >0.05  | >0.05 | >0.05 | >0.05  | >0.05  |
| SLF20 vs. SLF40 | <0.05  | <0.05  | >0.05  | >0.05  | >0.05  | >0.05  | >0.05 | >0.05 | <0.001 | <0.001 |
|                 |        |        |        |        |        |        |       |       | 1      |        |
| SLF40 vs. PPF80 | <0.001 | <0.001 | <0.001 | <0.001 | <0.001 | <0.001 | >0.05 | >0.05 | <0.001 | <0.001 |
|                 |        |        |        |        |        |        |       |       | 1      |        |
| SLF40 vs. PPF60 | <0.001 | <0.001 | <0.001 | <0.001 | <0.001 | <0.001 | >0.05 | >0.05 | <0.001 | <0.001 |
|                 |        |        |        |        |        |        |       |       | 1      |        |
| SLF40 vs. PPF40 | <0.001 | <0.001 | <0.001 | <0.001 | <0.01  | <0.01  | >0.05 | >0.05 | <0.01  | <0.01  |

|                 |        |        |        |        |        |        |       |       |        |        |
|-----------------|--------|--------|--------|--------|--------|--------|-------|-------|--------|--------|
| SLF40 vs. PPF20 | <0.001 | <0.001 | <0.01  | <0.01  | >0.05  | >0.05  | >0.05 | >0.05 | >0.05  | >0.05  |
| SLF40 vs. RPF80 | <0.001 | <0.001 | <0.01  | <0.01  | <0.01  | <0.01  | <0.01 | <0.01 | >0.05  | >0.05  |
| SLF40 vs. RPF60 | <0.001 | <0.001 | <0.05  | <0.05  | <0.01  | <0.01  | >0.05 | >0.05 | >0.05  | >0.05  |
| SLF40 vs. RPF40 | >0.05  | >0.05  | >0.05  | >0.05  | <0.01  | <0.01  | >0.05 | >0.05 | >0.05  | >0.05  |
| SLF40 vs. RPF20 | <0.05  | <0.05  | >0.05  | >0.05  | >0.05  | >0.05  | >0.05 | >0.05 | <0.001 | <0.001 |
| RPF20 vs. PPF80 | <0.001 | <0.001 | <0.001 | <0.001 | <0.01  | <0.01  | >0.05 | >0.05 | <0.001 | <0.001 |
| RPF20 vs. PPF60 | <0.001 | <0.001 | <0.001 | <0.001 | <0.01  | <0.01  | >0.05 | >0.05 | <0.001 | <0.001 |
| RPF20 vs. PPF40 | <0.001 | <0.001 | <0.001 | <0.001 | <0.01  | <0.01  | >0.05 | >0.05 | <0.001 | <0.001 |
| RPF20 vs. PPF20 | <0.001 | <0.001 | <0.001 | <0.001 | >0.05  | >0.05  | >0.05 | >0.05 | <0.001 | <0.001 |
| RPF20 vs. RPF80 | <0.001 | <0.001 | <0.001 | <0.001 | <0.01  | <0.01  | <0.01 | <0.01 | <0.001 | <0.001 |
| RPF20 vs. RPF60 | <0.001 | <0.001 | <0.01  | <0.01  | <0.01  | <0.01  | >0.05 | >0.05 | <0.001 | <0.001 |
| RPF20 vs. RPF40 | <0.001 | <0.001 | >0.05  | >0.05  | <0.05  | <0.05  | >0.05 | >0.05 | <0.001 | <0.001 |
| RPF40 vs. PPF80 | <0.001 | <0.001 | <0.001 | <0.001 | <0.001 | <0.001 | >0.05 | >0.05 | <0.001 | <0.001 |
| RPF40 vs. PPF60 | <0.001 | <0.001 | <0.01  | <0.01  | >0.05  | >0.05  | >0.05 | >0.05 | <0.001 | <0.001 |
| RPF40 vs. PPF40 | <0.001 | <0.001 | <0.01  | <0.01  | >0.05  | >0.05  | >0.05 | >0.05 | <0.001 | <0.001 |
| RPF40 vs. PPF20 | <0.001 | <0.001 | <0.05  | <0.05  | >0.05  | >0.05  | >0.05 | >0.05 | >0.05  | >0.05  |
| RPF40 vs. RPF80 | <0.001 | <0.001 | <0.001 | <0.001 | >0.05  | >0.05  | <0.01 | <0.01 | >0.05  | >0.05  |
| RPF40 vs. RPF60 | <0.001 | <0.001 | <0.01  | <0.01  | >0.05  | >0.05  | >0.05 | >0.05 | >0.05  | >0.05  |
| RPF60 vs. PPF80 | <0.001 | <0.001 | <0.001 | <0.001 | <0.001 | <0.001 | >0.05 | >0.05 | <0.01  | <0.01  |
| RPF60 vs. PPF60 | <0.001 | <0.001 | <0.01  | <0.01  | >0.05  | >0.05  | >0.05 | >0.05 | <0.01  | <0.01  |
| RPF60 vs. PPF40 | <0.001 | <0.001 | <0.05  | <0.05  | >0.05  | >0.05  | >0.05 | >0.05 | <0.01  | <0.01  |
| RPF60 vs. PPF20 | >0.05  | >0.05  | >0.05  | >0.05  | >0.05  | >0.05  | >0.05 | >0.05 | >0.05  | >0.05  |
| RPF60 vs. RPF80 | <0.001 | <0.001 | <0.001 | <0.001 | >0.05  | >0.05  | >0.05 | >0.05 | >0.05  | >0.05  |

|                 |        |        |        |        |       |       |       |       |        |        |
|-----------------|--------|--------|--------|--------|-------|-------|-------|-------|--------|--------|
| RPF80 vs. PPF80 | <0.001 | <0.001 | >0.05  | >0.05  | >0.05 | >0.05 | <0.01 | <0.01 | <0.001 | <0.001 |
|                 |        |        |        |        |       |       |       |       | 1      |        |
| RPF80 vs. PPF60 | <0.001 | <0.001 | >0.05  | >0.05  | >0.05 | >0.05 | <0.01 | <0.01 | <0.001 | <0.001 |
|                 |        |        |        |        |       |       |       |       | 1      |        |
| RPF80 vs. PPF40 | >0.05  | >0.05  | >0.05  | >0.05  | >0.05 | >0.05 | <0.01 | <0.01 | <0.001 | <0.001 |
|                 |        |        |        |        |       |       |       |       | 1      |        |
| RPF80 vs. PPF20 | <0.001 | <0.001 | <0.001 | <0.001 | >0.05 | >0.05 | <0.01 | <0.01 | >0.05  | >0.05  |
| PPF20 vs. PPF80 | <0.001 | <0.001 | <0.001 | <0.001 | <0.01 | <0.01 | >0.05 | >0.05 | <0.001 | <0.001 |
|                 |        |        |        |        |       |       |       |       | 1      |        |
| PPF20 vs. PPF60 | <0.001 | <0.001 | <0.001 | <0.001 | >0.05 | >0.05 | >0.05 | >0.05 | <0.001 | <0.001 |
|                 |        |        |        |        |       |       |       |       | 1      |        |
| PPF20 vs. PPF40 | <0.001 | <0.001 | <0.001 | <0.001 | >0.05 | >0.05 | >0.05 | >0.05 | <0.001 | <0.001 |
|                 |        |        |        |        |       |       |       |       | 1      |        |
| PPF40 vs. PPF80 | <0.001 | <0.001 | <0.001 | <0.001 | <0.01 | <0.01 | >0.05 | >0.05 | >0.05  | >0.05  |
| PPF40 vs. PPF60 | <0.001 | <0.001 | >0.05  | >0.05  | >0.05 | >0.05 | >0.05 | >0.05 | >0.05  | >0.05  |
| PPF60 vs. PPF80 | <0.001 | <0.001 | <0.01  | <0.01  | >0.05 | >0.05 | >0.05 | >0.05 | >0.05  | >0.05  |

Table S4. Orthogonal contrasts (*p*-values) of nutritional composition of *Tenebrio molitor* larvae.

| Groups       | Moisture                  |                              | Crude protein             |                              | Crude fat                 |                              |
|--------------|---------------------------|------------------------------|---------------------------|------------------------------|---------------------------|------------------------------|
|              | <i>p</i> -value<br>linear | <i>p</i> -value<br>quadratic | <i>p</i> -value<br>linear | <i>p</i> -value<br>quadratic | <i>p</i> -value<br>linear | <i>p</i> -value<br>quadratic |
| WB vs. PPF80 | <0.001                    | <0.001                       | <0.001                    | <0.001                       | <0.001                    | <0.001                       |
| WB vs. PPF60 | <0.001                    | <0.001                       | <0.001                    | <0.001                       | <0.001                    | <0.001                       |
| WB vs. PPF40 | >0.05                     | >0.05                        | <0.001                    | <0.001                       | <0.001                    | <0.01                        |
| WB vs. PPF20 | <0.001                    | <0.001                       | <0.001                    | <0.001                       | >0.05                     | >0.05                        |
| WB vs. RPF80 | >0.05                     | >0.05                        | <0.001                    | <0.001                       | <0.001                    | <0.001                       |
| WB vs. RPF60 | >0.05                     | >0.05                        | >0.05                     | >0.05                        | <0.01                     | <0.01                        |
| WB vs. RPF40 | <0.001                    | <0.001                       | >0.05                     | >0.05                        | <0.01                     | <0.01                        |
| WB vs. RPF20 | <0.001                    | <0.001                       | >0.05                     | >0.05                        | >0.05                     | >0.05                        |
| WB vs. SLF40 | <0.001                    | <0.001                       | <0.001                    | <0.001                       | >0.05                     | >0.05                        |
| WB vs. SLF20 | <0.001                    | <0.001                       | <0.001                    | <0.001                       | <0.001                    | <0.001                       |
| WB vs. CF10  | <0.001                    | <0.001                       | <0.001                    | <0.001                       | <0.001                    | <0.001                       |
| WB vs. PF10  | <0.001                    | <0.001                       | <0.001                    | <0.001                       | <0.01                     | <0.01                        |

---

|                 |        |        |        |        |        |        |
|-----------------|--------|--------|--------|--------|--------|--------|
| PF10 vs. PPF80  | <0.001 | <0.001 | <0.001 | <0.001 | <0.001 | <0.001 |
| PF10 vs. PPF60  | <0.001 | <0.001 | <0.001 | <0.001 | <0.001 | <0.001 |
| PF10 vs. PPF40  | <0.001 | <0.001 | <0.001 | <0.001 | <0.001 | <0.001 |
| PF10 vs. PPF20  | <0.001 | <0.001 | <0.001 | <0.001 | <0.001 | <0.001 |
| PF10 vs. RPF80  | <0.001 | <0.001 | <0.001 | <0.001 | <0.001 | <0.001 |
| PF10 vs. RPF60  | <0.001 | <0.001 | <0.001 | <0.001 | <0.001 | <0.001 |
| PF10 vs. RPF40  | <0.001 | <0.001 | <0.001 | <0.001 | <0.001 | <0.001 |
| PF10 vs. RPF20  | <0.001 | <0.001 | <0.001 | <0.001 | <0.01  | <0.01  |
| PF10 vs. SLF40  | >0.05  | >0.05  | <0.001 | <0.001 | <0.01  | <0.01  |
| PF10 vs. SLF20  | >0.05  | >0.05  | <0.001 | <0.001 | <0.01  | <0.01  |
| PF10 vs. CF10   | >0.05  | >0.05  | >0.05  | >0.05  | >0.05  | >0.05  |
| CF10 vs. PPF80  | <0.001 | <0.001 | <0.001 | <0.001 | <0.001 | <0.001 |
| CF10 vs. PPF60  | <0.001 | <0.001 | <0.001 | <0.001 | <0.001 | <0.001 |
| CF10 vs. PPF40  | <0.001 | <0.001 | <0.001 | <0.001 | <0.001 | <0.001 |
| CF10 vs. PPF20  | <0.001 | <0.001 | <0.001 | <0.001 | <0.001 | <0.001 |
| CF10 vs. RPF80  | <0.001 | <0.001 | <0.001 | <0.001 | <0.001 | <0.001 |
| CF10 vs. RPF60  | <0.001 | <0.001 | <0.001 | <0.001 | <0.001 | <0.001 |
| CF10 vs. RPF40  | <0.001 | <0.001 | <0.001 | <0.001 | <0.001 | <0.001 |
| CF10 vs. RPF20  | <0.001 | <0.001 | <0.001 | <0.001 | <0.01  | <0.01  |
| CF10 vs. SLF40  | >0.05  | >0.05  | >0.05  | >0.05  | >0.05  | >0.05  |
| CF10 vs. SLF20  | >0.05  | >0.05  | >0.05  | >0.05  | >0.05  | >0.05  |
| SLF20 vs. PPF80 | <0.001 | <0.001 | <0.001 | <0.001 | <0.001 | <0.001 |
| SLF20 vs. PPF60 | <0.001 | <0.001 | <0.001 | <0.001 | <0.001 | <0.001 |
| SLF20 vs. PPF40 | <0.001 | <0.001 | >0.05  | >0.05  | <0.001 | <0.001 |
| SLF20 vs. PPF20 | <0.001 | <0.001 | >0.05  | >0.05  | <0.01  | <0.01  |
| SLF20 vs. RPF80 | <0.001 | <0.001 | <0.001 | <0.001 | <0.001 | <0.001 |
| SLF20 vs. RPF60 | <0.001 | <0.001 | <0.001 | <0.001 | <0.001 | <0.001 |
| SLF20 vs. RPF40 | <0.001 | <0.001 | <0.001 | <0.001 | <0.001 | <0.001 |
| SLF20 vs. RPF20 | <0.001 | <0.001 | <0.001 | <0.001 | <0.01  | <0.01  |
| SLF20 vs. SLF40 | >0.05  | >0.05  | >0.05  | >0.05  | <0.01  | <0.01  |
| SLF40 vs. PPF80 | <0.001 | <0.001 | <0.001 | <0.001 | <0.001 | <0.001 |
| SLF40 vs. PPF60 | <0.001 | <0.001 | <0.001 | <0.001 | <0.01  | <0.01  |
| SLF40 vs. PPF40 | <0.001 | <0.001 | >0.05  | >0.05  | <0.01  | <0.01  |
| SLF40 vs. PPF20 | <0.001 | <0.001 | >0.05  | >0.05  | >0.05  | >0.05  |

---

|                 |        |        |        |        |        |        |
|-----------------|--------|--------|--------|--------|--------|--------|
| SLF40 vs. RPF80 | <0.001 | <0.001 | <0.001 | <0.001 | <0.001 | <0.001 |
| SLF40 vs. RPF60 | <0.001 | <0.001 | <0.001 | <0.001 | <0.01  | <0.01  |
| SLF40 vs. RPF40 | <0.001 | <0.001 | <0.01  | <0.01  | <0.01  | <0.01  |
| SLF40 vs. RPF20 | <0.001 | <0.001 | <0.01  | <0.01  | >0.05  | >0.05  |
| RPF20 vs. PPF80 | <0.001 | <0.001 | <0.001 | <0.001 | <0.001 | <0.001 |
| RPF20 vs. PPF60 | <0.001 | <0.001 | <0.001 | <0.001 | <0.01  | <0.01  |
| RPF20 vs. PPF40 | <0.001 | <0.001 | <0.001 | <0.001 | <0.01  | <0.01  |
| RPF20 vs. PPF20 | >0.05  | >0.05  | <0.001 | <0.001 | >0.05  | >0.05  |
| RPF20 vs. RPF80 | <0.001 | <0.001 | <0.001 | <0.001 | <0.01  | <0.01  |
| RPF20 vs. RPF60 | <0.001 | <0.001 | >0.05  | >0.05  | <0.01  | <0.01  |
| RPF20 vs. RPF40 | >0.05  | >0.05  | >0.05  | >0.05  | <0.01  | <0.01  |
| RPF40 vs. PPF80 | <0.001 | <0.001 | <0.001 | <0.001 | <0.001 | <0.001 |
| RPF40 vs. PPF60 | <0.001 | <0.001 | <0.001 | <0.001 | <0.001 | <0.001 |
| RPF40 vs. PPF40 | <0.001 | <0.001 | <0.001 | <0.001 | >0.05  | >0.05  |
| RPF40 vs. PPF20 | >0.05  | >0.05  | <0.001 | <0.001 | <0.001 | <0.001 |
| RPF40 vs. RPF80 | <0.001 | <0.001 | <0.001 | <0.001 | <0.01  | <0.001 |
| RPF40 vs. RPF60 | <0.001 | <0.001 | >0.05  | >0.05  | >0.05  | >0.05  |
| RPF60 vs. PPF80 | <0.001 | <0.001 | <0.001 | <0.001 | <0.001 | <0.001 |
| RPF60 vs. PPF60 | <0.001 | <0.001 | <0.001 | <0.001 | <0.001 | <0.001 |
| RPF60 vs. PPF40 | >0.05  | >0.05  | <0.001 | <0.001 | >0.05  | >0.05  |
| RPF60 vs. PPF20 | <0.001 | <0.001 | <0.001 | <0.001 | <0.001 | <0.001 |
| RPF60 vs. RPF80 | >0.05  | >0.05  | <0.001 | <0.001 | <0.01  | <0.01  |
| RPF80 vs. PPF80 | <0.001 | <0.001 | <0.001 | <0.001 | >0.05  | >0.05  |
| RPF80 vs. PPF60 | <0.001 | <0.001 | <0.001 | <0.001 | >0.05  | >0.05  |
| RPF80 vs. PPF40 | >0.05  | >0.05  | <0.001 | <0.001 | <0.001 | <0.001 |
| RPF80 vs. PPF20 | <0.001 | <0.001 | <0.001 | <0.001 | <0.001 | <0.001 |
| PPF20 vs. PPF80 | <0.001 | <0.001 | <0.001 | <0.001 | <0.001 | <0.001 |
| PPF20 vs. PPF60 | <0.001 | <0.001 | <0.001 | <0.001 | <0.001 | <0.001 |
| PPF20 vs. PPF40 | <0.001 | <0.001 | >0.05  | >0.05  | <0.001 | <0.001 |
| PPF40 vs. PPF80 | <0.001 | <0.001 | <0.001 | <0.001 | <0.01  | <0.01  |
| PPF40 vs. PPF60 | <0.001 | <0.001 | <0.001 | <0.001 | <0.01  | <0.01  |
| PPF60 vs. PPF80 | >0.05  | >0.05  | >0.05  | >0.05  | >0.05  | >0.05  |
| Start vs. PPF80 | <0.001 | <0.001 | <0.001 | <0.001 | <0.001 | <0.001 |
| Start vs. PPF60 | <0.001 | <0.001 | <0.001 | <0.001 | <0.001 | <0.001 |
